# Supplementary material for: Improvement of the photostability of cycloalkylamine-7-sulfonyl-2,1,3-benzoxadiazole-based fluorescent dyes by replacing the dimethylamino substituent with cyclic amino rings
Source: Royal Society of Chemistry journal article supplement (doi:10.1039/d1nj05499f), 2022-01-01
Supplement: d1nj05499f1.pdf [file d1nj05499f1.pdf]

# Supporting Information

## **Improvement of photostability of cycloalkylamine-7-sulfonyl-2,1,3-benzoxadiazole-based fluorescent dyes by replacing dimethylamino substituent with cyclic amino rings**

Pramod Kumar Mehta, Ki Ryu, Chan Kyung Kim\* and Keun-Hyeung Lee\*

Research Center for Controlling Intercellular Communication and Education and Research

Center for Smart Energy Materials and Process, Department of Chemistry and Chemical

Engineering, Inha University, Incheon 402-751, South Korea

\*E-mail: [leekh@inha.ac.kr](mailto:leekh@inha.ac.kr), [kckyung@inha.ac.kr](mailto:kckyung@inha.ac.kr)

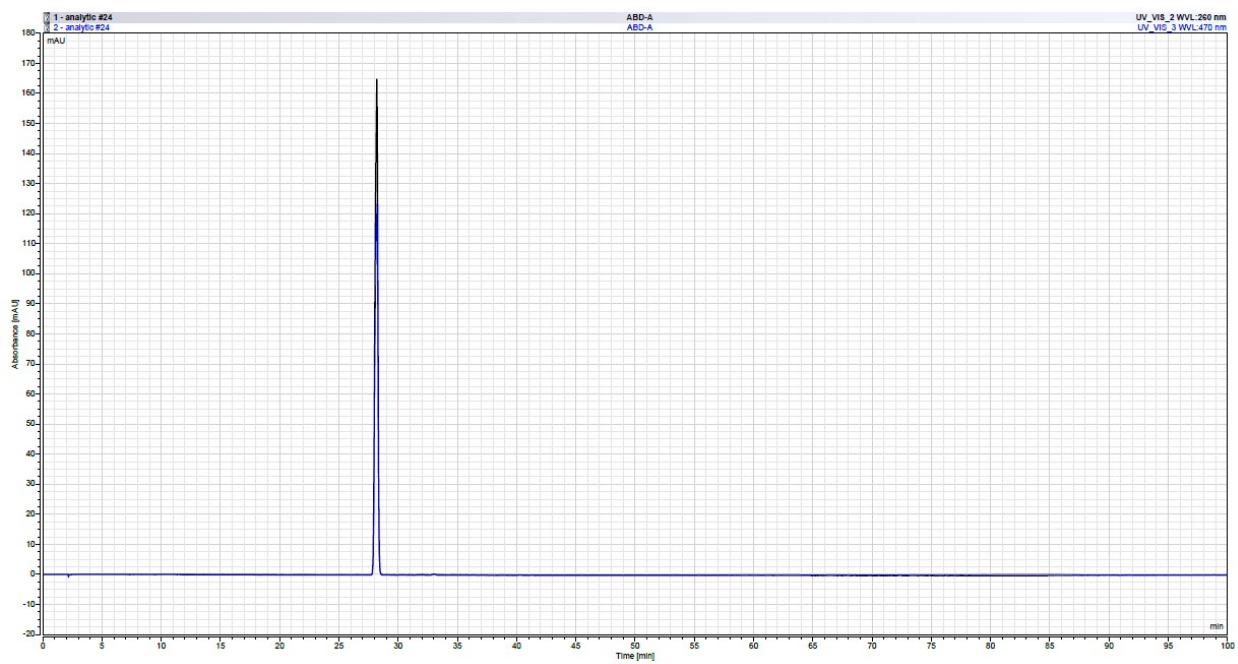

**Figure S1.** HPLC chromatogram of **1**

+MS, 0.1-0.4min #3-24

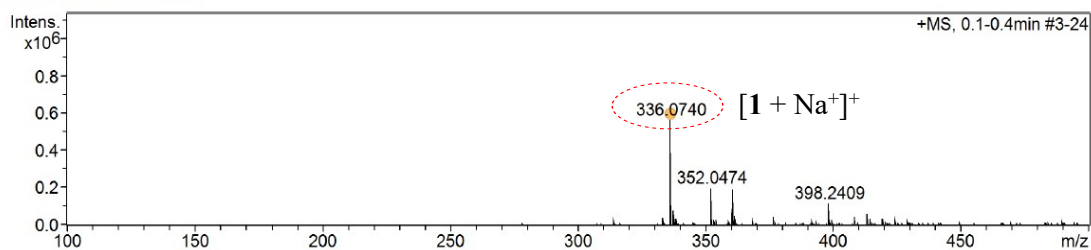

| Meas. m/z | #  | Ion Formula                                                                   | m/z      | err [ppm] | mSigma | # Sigma | Score  | rdb  | e <sup>-</sup> Conf | N-Rule |
|-----------|----|-------------------------------------------------------------------------------|----------|-----------|--------|---------|--------|------|---------------------|--------|
| 336.0740  | 1  | C <sub>9</sub> H <sub>10</sub> N <sub>11</sub> O <sub>2</sub> S               | 336.0734 | -1.7      | 3.0    | 1       | 100.00 | 10.5 | even                | ok     |
|           | 2  | C <sub>12</sub> H <sub>18</sub> NO <sub>8</sub> S                             | 336.0748 | -2.3      | 7.0    | 2       | 83.11  | 4.5  | even                | ok     |
|           | 3  | C <sub>8</sub> H <sub>14</sub> N <sub>7</sub> O <sub>6</sub> S                | 336.0721 | 5.6       | 9.4    | 3       | 39.31  | 5.5  | even                | ok     |
|           | 4  | C <sub>13</sub> H <sub>14</sub> N <sub>5</sub> O <sub>4</sub> S               | 336.0761 | 6.3       | 14.8   | 4       | 29.78  | 9.5  | even                | ok     |
|           | 5  | C <sub>7</sub> H <sub>18</sub> N <sub>3</sub> O <sub>10</sub> S               | 336.0707 | -9.6      | 21.4   | 5       | 9.53   | 0.5  | even                | ok     |
|           | 6  | C <sub>14</sub> H <sub>10</sub> N <sub>9</sub> S                              | 336.0774 | 10.3      | 26.0   | 6       | 6.78   | 14.5 | even                | ok     |
|           | 7  | C <sub>16</sub> H <sub>18</sub> NO <sub>3</sub> S <sub>2</sub>                | 336.0723 | -5.1      | 35.1   | 7       | 31.84  | 8.5  | even                | ok     |
|           | 8  | C <sub>9</sub> H <sub>18</sub> N <sub>7</sub> O <sub>5</sub> S <sub>3</sub>   | 336.0729 | 3.1       | 40.2   | 8       | 43.11  | 4.5  | even                | ok     |
|           | 9  | C <sub>8</sub> H <sub>22</sub> N <sub>3</sub> O <sub>5</sub> S <sub>3</sub>   | 336.0716 | 7.0       | 42.8   | 9       | 15.63  | -0.5 | even                | ok     |
|           | 10 | C <sub>13</sub> H <sub>22</sub> NO <sub>3</sub> S <sub>3</sub>                | 336.0756 | 4.9       | 45.7   | 10      | 24.77  | 3.5  | even                | ok     |
|           | 1  | C <sub>11</sub> H <sub>15</sub> N <sub>5</sub> NaO <sub>4</sub> S             | 336.0737 | 0.8       | 4.3    | 1       | 100.00 | 6.5  | even                | ok     |
|           | 2  | C <sub>7</sub> H <sub>11</sub> N <sub>11</sub> NaO <sub>2</sub> S             | 336.0710 | -8.8      | 8.0    | 2       | 14.55  | 7.5  | even                | ok     |
|           | 3  | C <sub>10</sub> H <sub>19</sub> NNaO <sub>8</sub> S                           | 336.0724 | -4.8      | 9.8    | 3       | 42.72  | 1.5  | even                | ok     |
|           | 4  | C <sub>12</sub> H <sub>11</sub> N <sub>9</sub> NaS                            | 336.0750 | -3.1      | 15.1   | 4       | 54.99  | 11.5 | even                | ok     |
|           | 5  | C <sub>8</sub> H <sub>19</sub> N <sub>5</sub> NaO <sub>4</sub> S <sub>2</sub> | 336.0771 | 9.2       | 22.4   | 5       | 12.09  | 1.5  | even                | ok     |
|           | 6  | C <sub>16</sub> H <sub>15</sub> N <sub>3</sub> NaO <sub>2</sub> S             | 336.0777 | -11.1     | 26.8   | 6       | 4.39   | 10.5 | even                | ok     |
|           | 7  | C <sub>7</sub> H <sub>19</sub> N <sub>7</sub> NaOS <sub>3</sub>               | 336.0705 | -10.2     | 39.1   | 7       | 5.63   | 1.5  | even                | ok     |
|           | 8  | C <sub>11</sub> H <sub>23</sub> NNaO <sub>3</sub> S <sub>3</sub>              | 336.0732 | 2.2       | 42.1   | 8       | 42.71  | 0.5  | even                | ok     |

Figure S2. HRMS (ESI-TOF) spectrum of 1

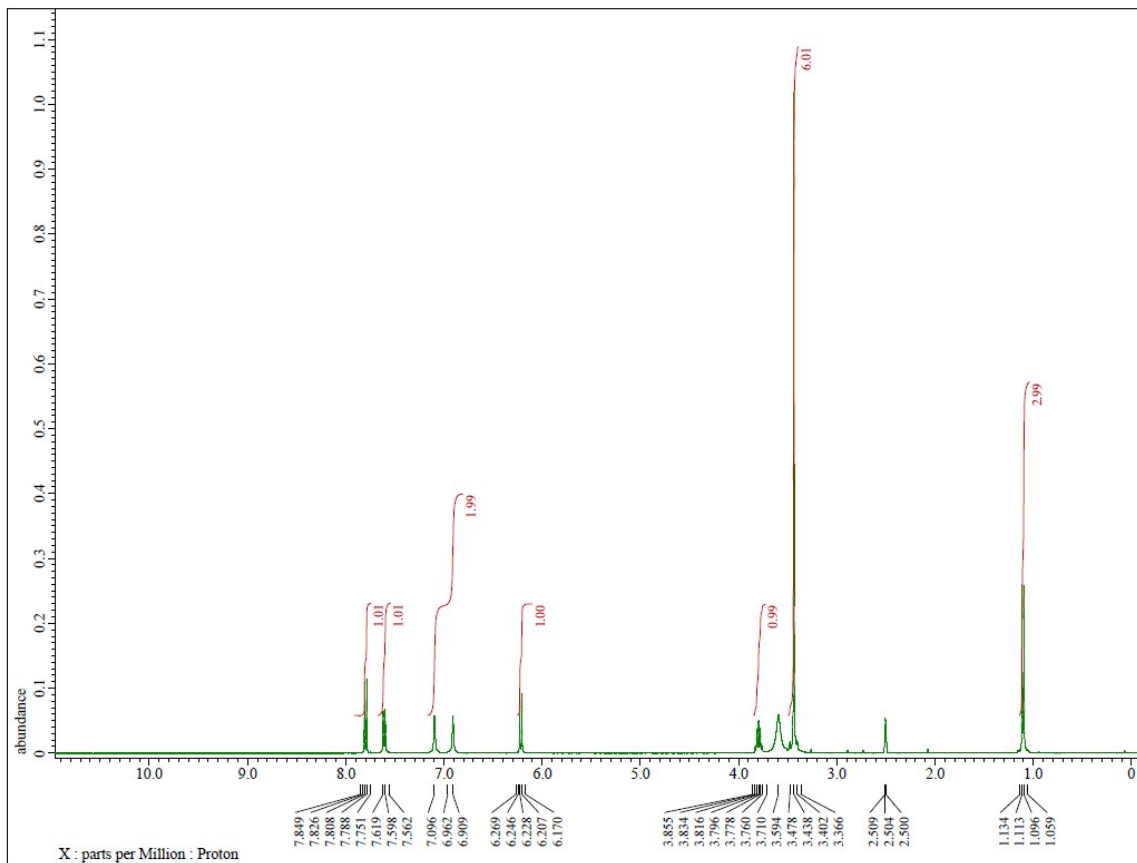

**Figure S3.**  $^1\text{H}$ -NMR spectrum of **1** in DMSO-D<sub>6</sub>

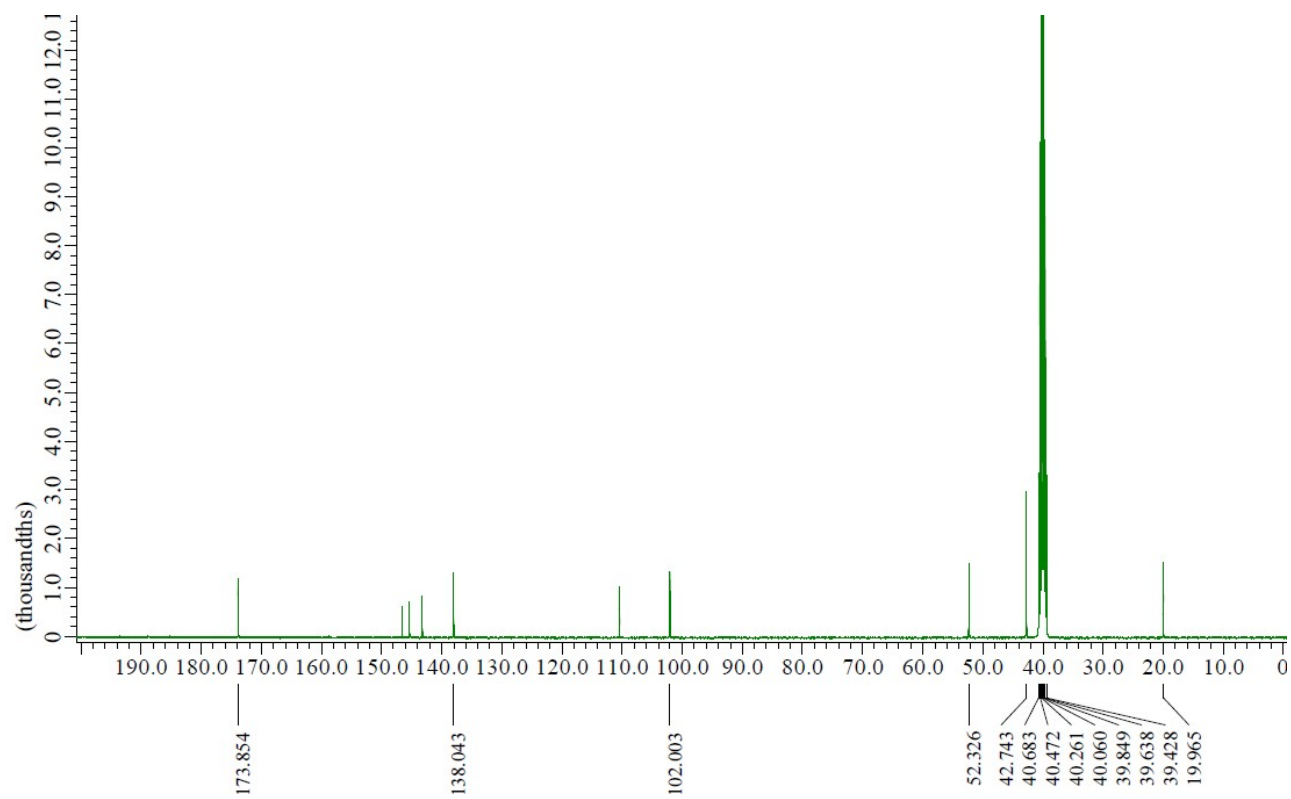

**Figure S4.**  $^{13}\text{C}$ -NMR spectrum of **1** in  $\text{DMSO-}d_6$

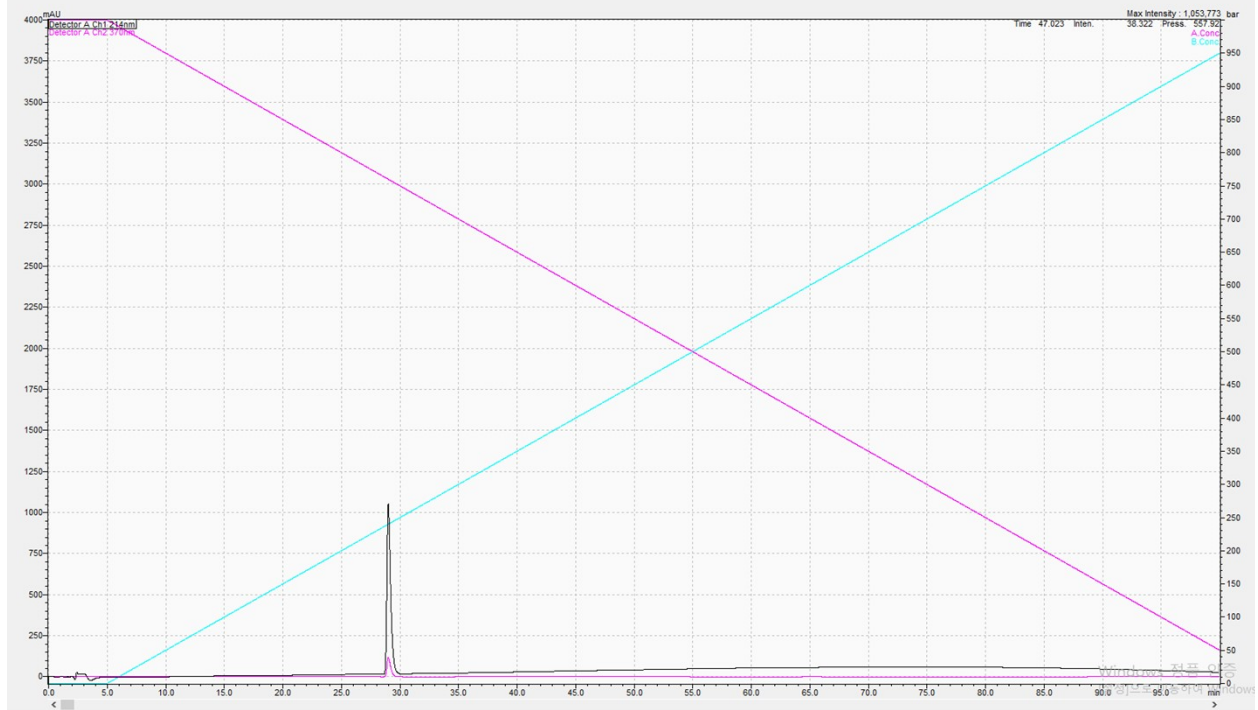

**Figure S5.** HPLC chromatogram of **2**

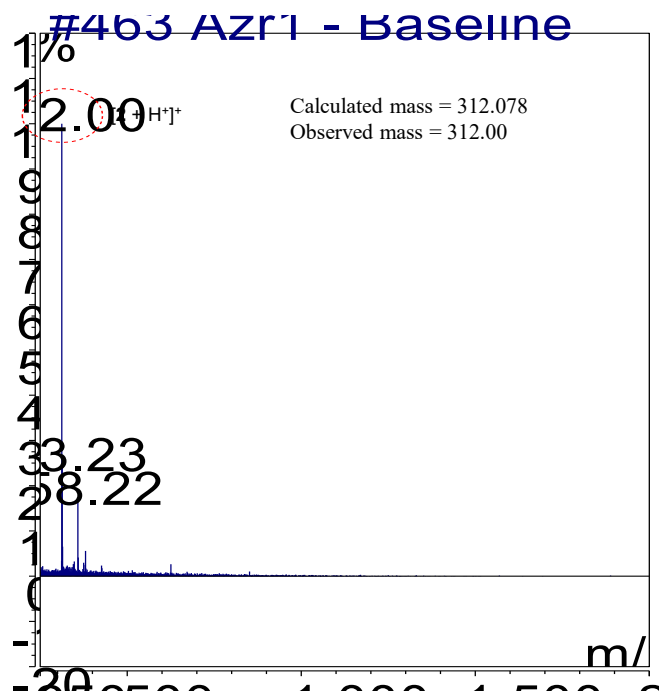

Figure S6a. ESI-MS spectrum of 2

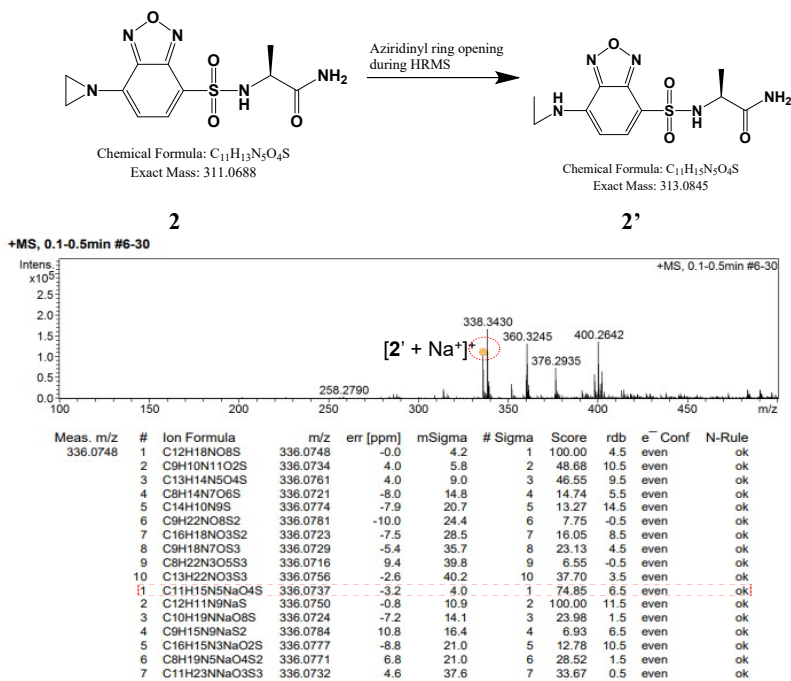

Figure S6b. Aziridinyll ring opening and HRMS (ESI-TOF) spectrum of 2'

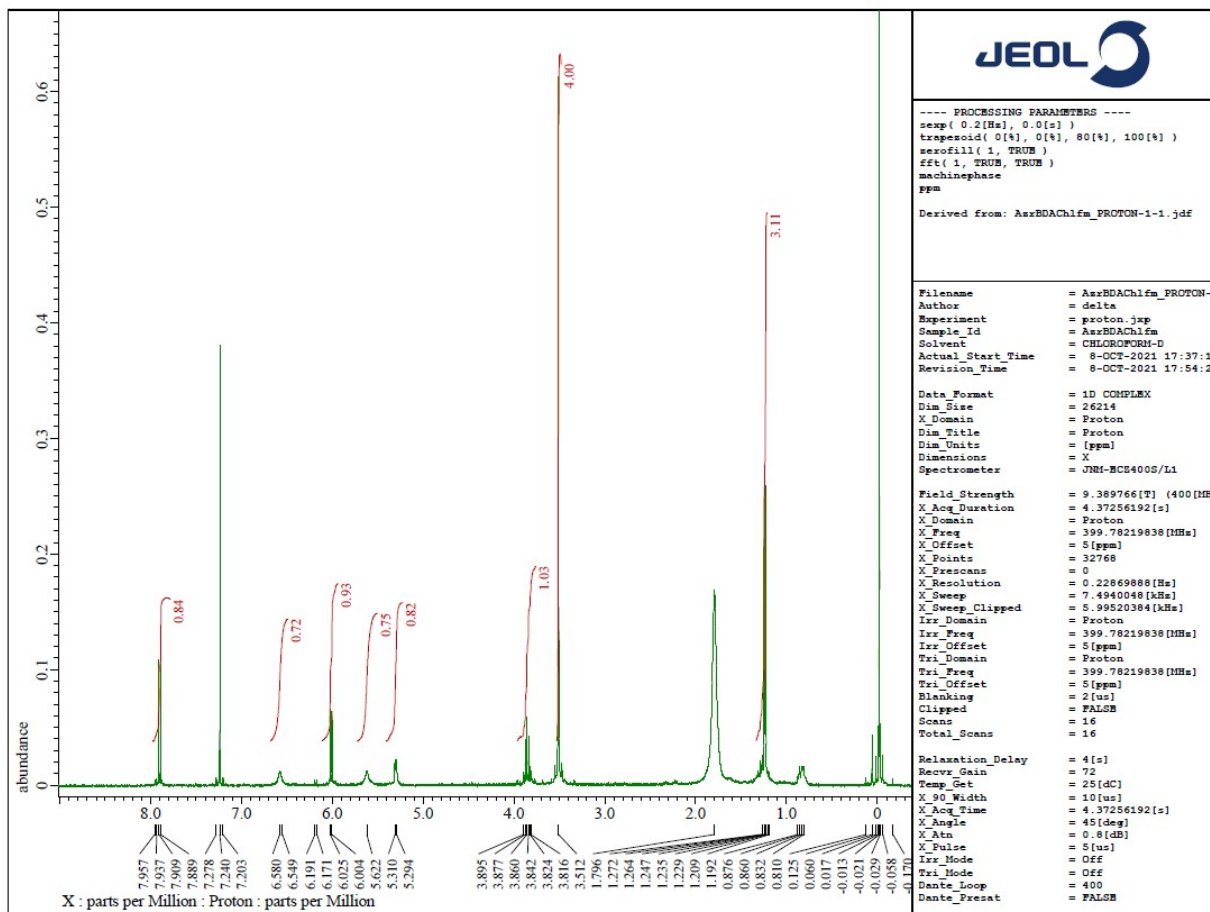

Figure S7. <sup>1</sup>H-NMR spectrum of **2** in CDCl<sub>3</sub>



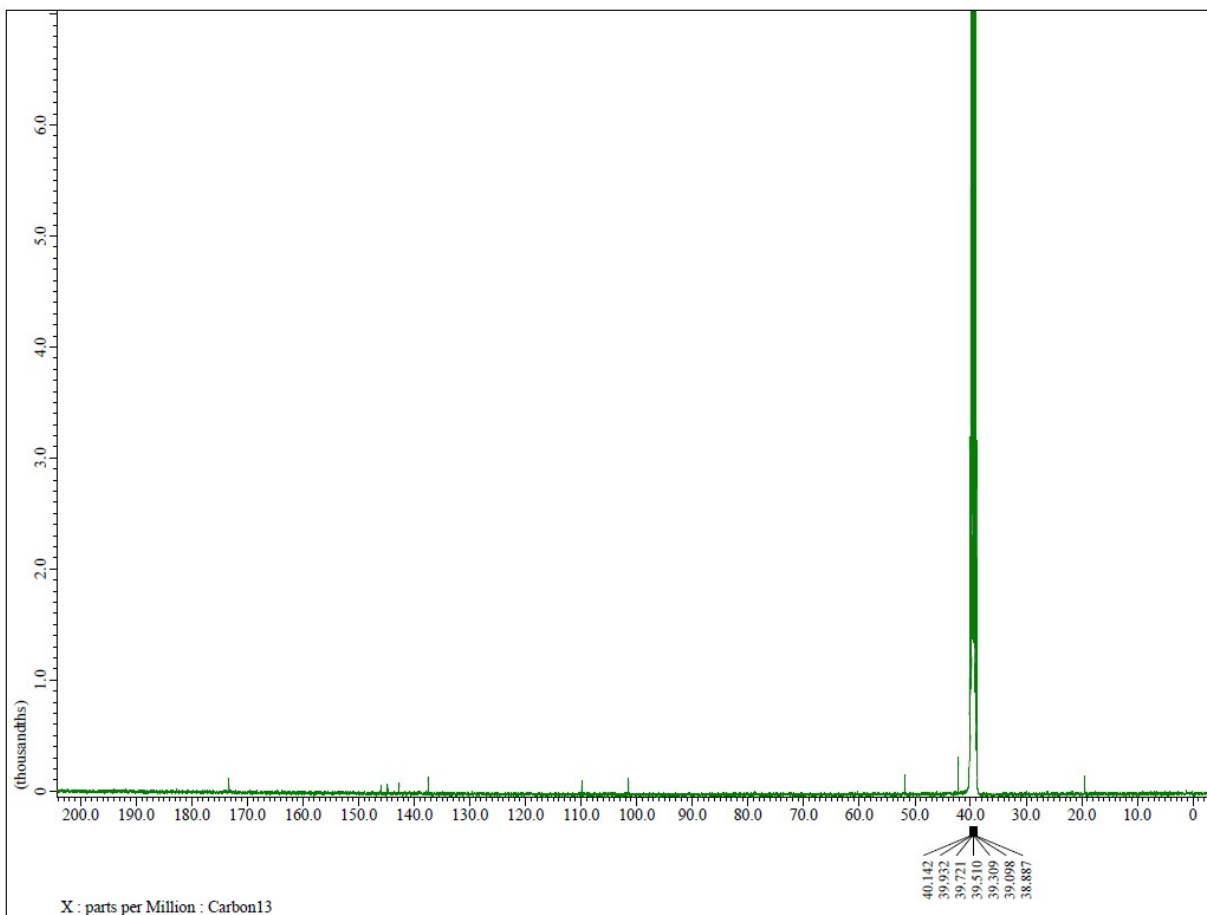

**Figure S8.**  $^{13}\text{C}$ -NMR spectrum of **2** in DMSO-D6

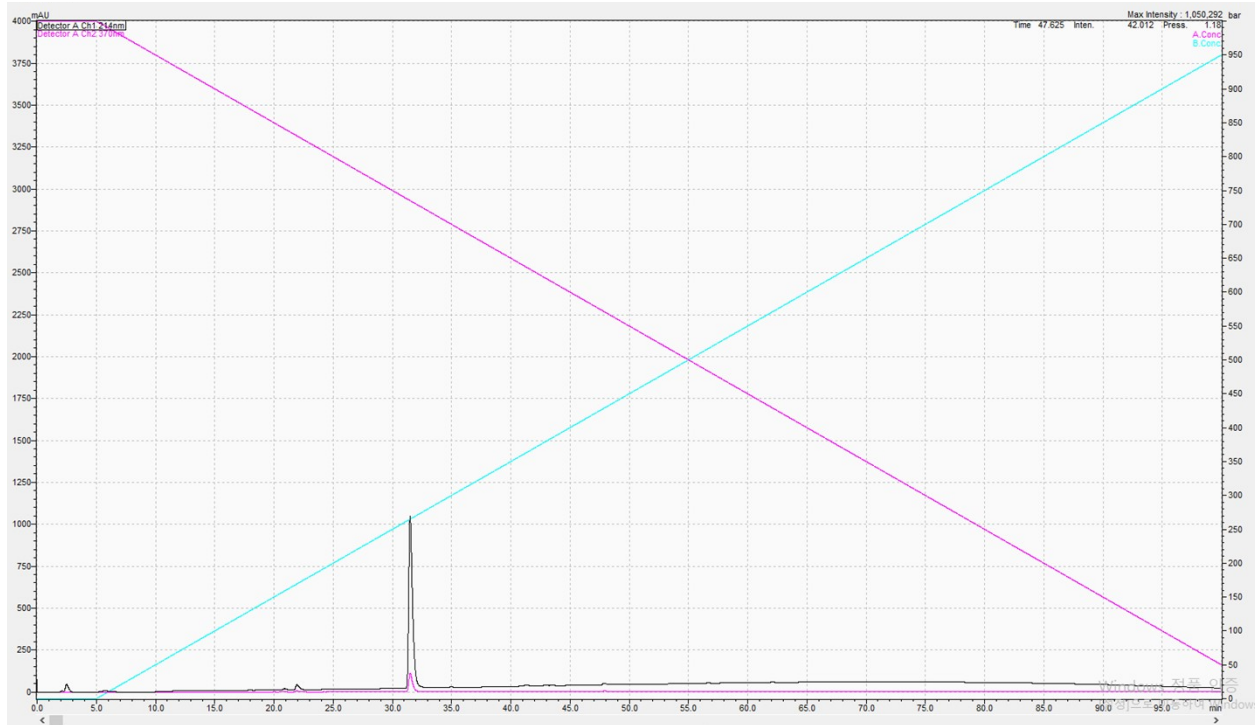

**Figure S9.** HPLC chromatogram of **3**

+MS, 0.4-0.8min #24-49

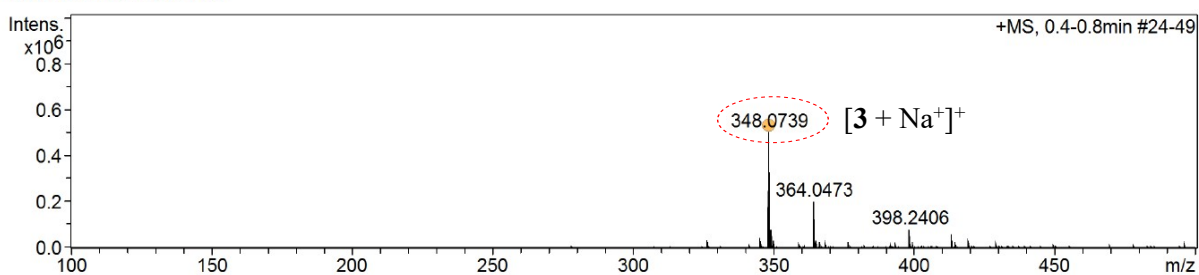

| Meas. m/z | #  | Ion Formula                                                                   | m/z      | err [ppm] | mSigma | # Sigma | Score  | rdb  | e <sup>-</sup> Conf | N-Rule |
|-----------|----|-------------------------------------------------------------------------------|----------|-----------|--------|---------|--------|------|---------------------|--------|
| 348.0739  | 1  | C <sub>10</sub> H <sub>10</sub> N <sub>11</sub> O <sub>2</sub> S              | 348.0734 | 1.3       | 1.1    | 1       | 100.00 | 11.5 | even                | ok     |
|           | 2  | C <sub>13</sub> H <sub>18</sub> N <sub>8</sub> O <sub>8</sub> S               | 348.0748 | -2.5      | 5.4    | 2       | 75.22  | 5.5  | even                | ok     |
|           | 3  | C <sub>9</sub> H <sub>14</sub> N <sub>7</sub> O <sub>6</sub> S                | 348.0721 | -5.2      | 11.8   | 3       | 37.26  | 6.5  | even                | ok     |
|           | 4  | C <sub>14</sub> H <sub>14</sub> N <sub>5</sub> O <sub>4</sub> S               | 348.0761 | -6.4      | 11.8   | 4       | 27.13  | 10.5 | even                | ok     |
|           | 5  | C <sub>15</sub> H <sub>10</sub> N <sub>9</sub> S                              | 348.0774 | -10.2     | 23.1   | 5       | 6.06   | 15.5 | even                | ok     |
|           | 6  | C <sub>17</sub> H <sub>18</sub> N <sub>3</sub> O <sub>3</sub> S <sub>2</sub>  | 348.0723 | 4.7       | 32.8   | 6       | 33.32  | 9.5  | even                | ok     |
|           | 7  | C <sub>10</sub> H <sub>18</sub> N <sub>7</sub> O <sub>5</sub> S <sub>3</sub>  | 348.0729 | -2.7      | 39.1   | 7       | 43.36  | 5.5  | even                | ok     |
|           | 8  | C <sub>9</sub> H <sub>22</sub> N <sub>3</sub> O <sub>5</sub> S <sub>3</sub>   | 348.0716 | 6.5       | 42.3   | 8       | 15.89  | 0.5  | even                | ok     |
|           | 9  | C <sub>14</sub> H <sub>22</sub> N <sub>3</sub> O <sub>3</sub> S <sub>3</sub>  | 348.0756 | -5.0      | 44.2   | 9       | 22.42  | 4.5  | even                | ok     |
|           | 10 | C <sub>10</sub> H <sub>26</sub> N <sub>3</sub> S <sub>5</sub>                 | 348.0725 | 4.0       | 79.3   | 10      | 8.51   | -0.5 | even                | ok     |
|           | 1  | C <sub>12</sub> H <sub>15</sub> N <sub>5</sub> NaO <sub>4</sub> S             | 348.0737 | -0.5      | 1.7    | 1       | 100.00 | 7.5  | even                | ok     |
|           | 2  | C <sub>11</sub> H <sub>19</sub> NNaO <sub>8</sub> S                           | 348.0724 | 4.4       | 11.8   | 2       | 40.30  | 2.5  | even                | ok     |
|           | 3  | C <sub>13</sub> H <sub>11</sub> N <sub>9</sub> NaS                            | 348.0750 | 3.3       | 12.4   | 3       | 50.51  | 12.5 | even                | ok     |
|           | 4  | C <sub>9</sub> H <sub>19</sub> N <sub>5</sub> NaO <sub>4</sub> S <sub>2</sub> | 348.0771 | 9.1       | 22.3   | 4       | 10.13  | 2.5  | even                | ok     |
|           | 5  | C <sub>17</sub> H <sub>15</sub> N <sub>3</sub> NaO <sub>2</sub> S             | 348.0777 | -11.0     | 23.9   | 5       | 3.88   | 11.5 | even                | ok     |
|           | 6  | C <sub>12</sub> H <sub>23</sub> NNaO <sub>3</sub> S <sub>3</sub>              | 348.0732 | 1.9       | 41.0   | 6       | 42.48  | 1.5  | even                | ok     |

Figure S10. HRMS (ESI-TOF) spectrum of **3**

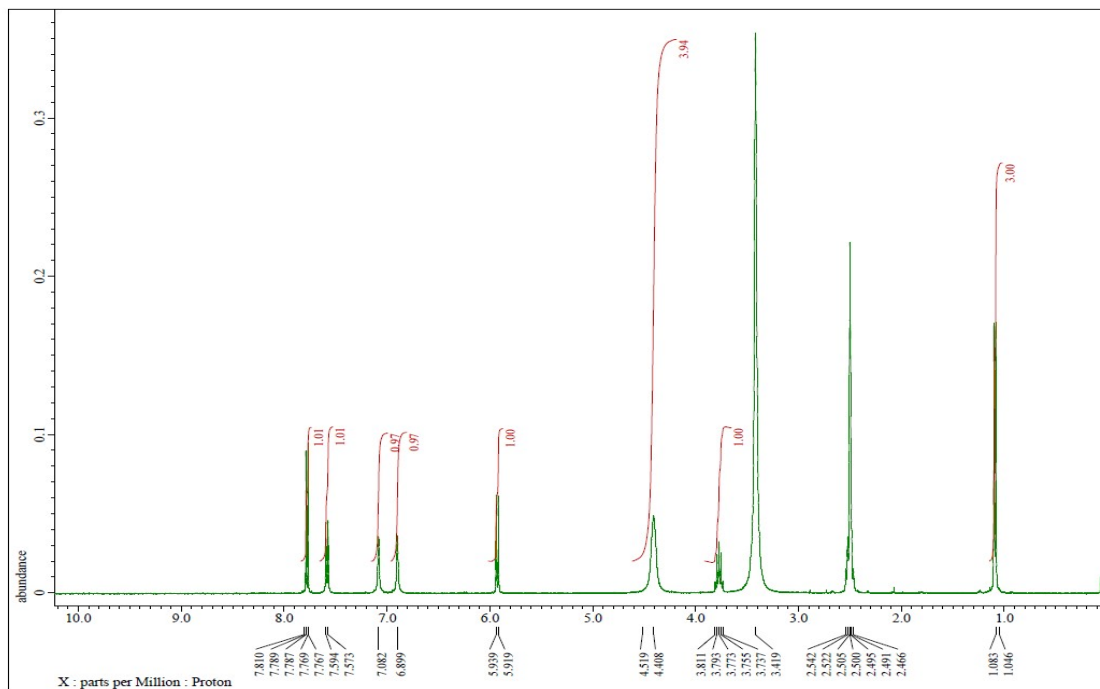

Figure S11a. <sup>1</sup>H-NMR spectrum of 3 in DMSO-D<sub>6</sub>

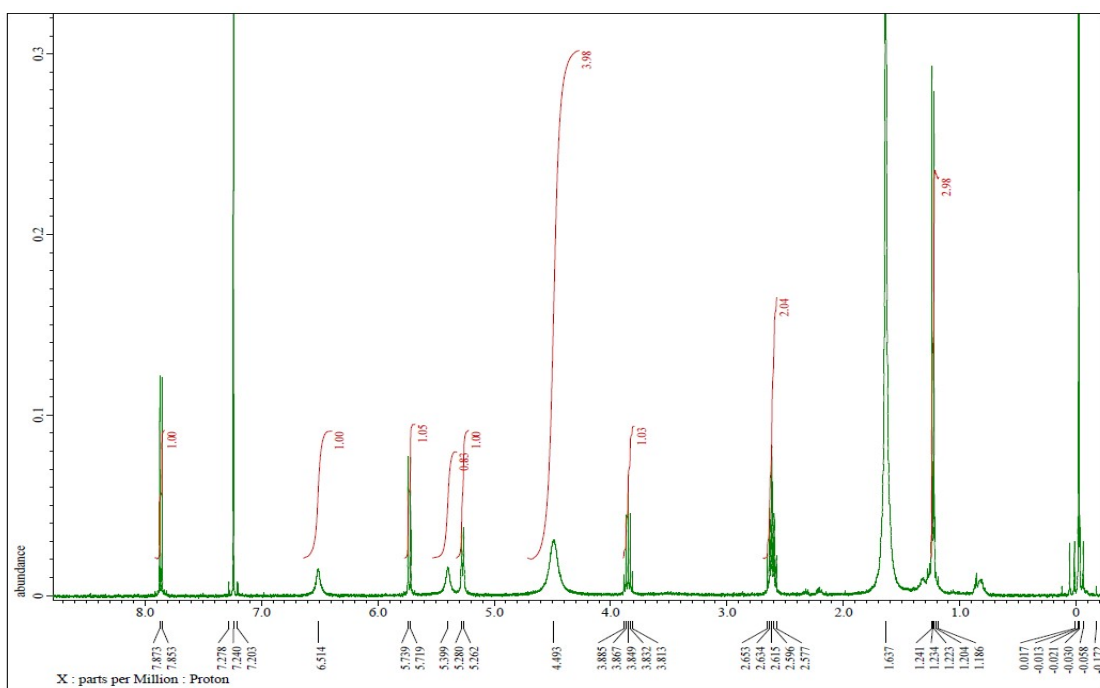

Figure S11b. <sup>1</sup>H-NMR spectrum of 3 in CDCl<sub>3</sub>

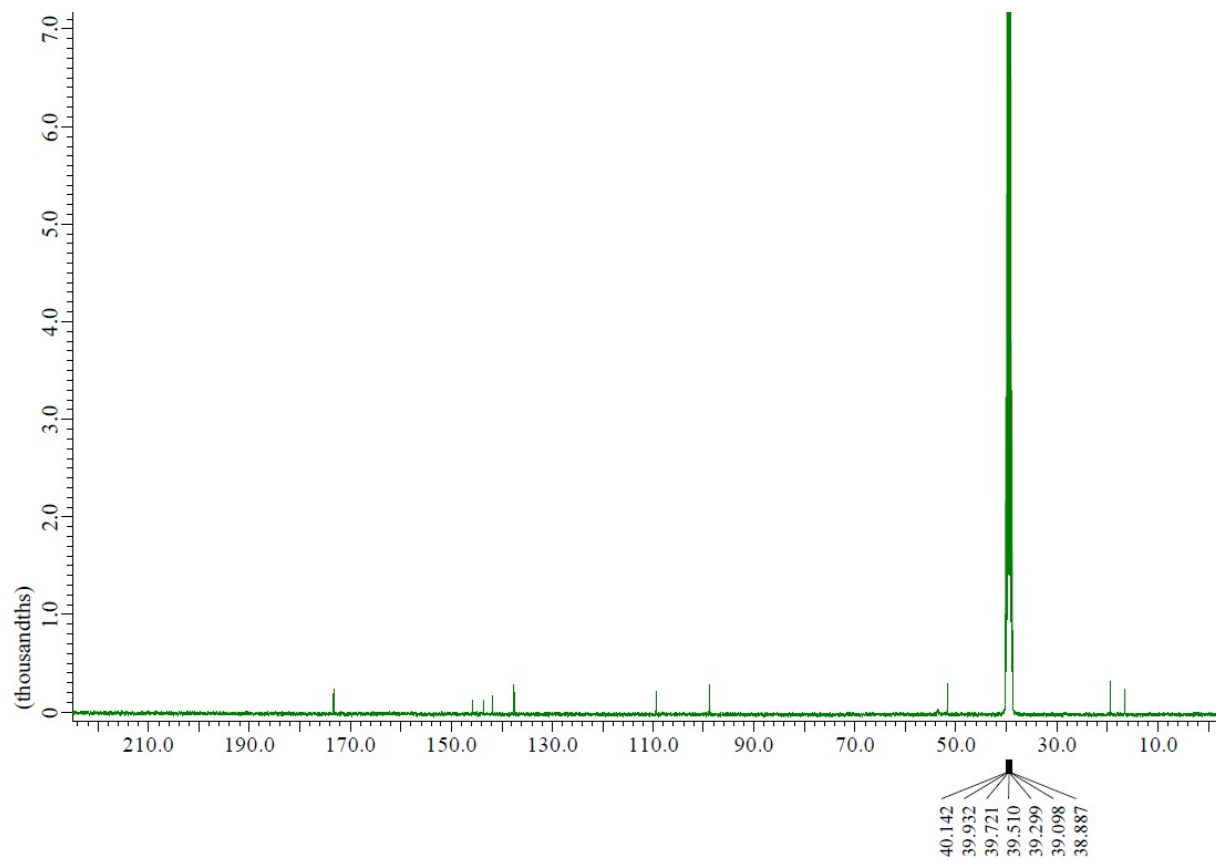

**Figure S12.**  $^{13}\text{C}$ -NMR spectrum of **3** in DMSO- $\text{D}_6$

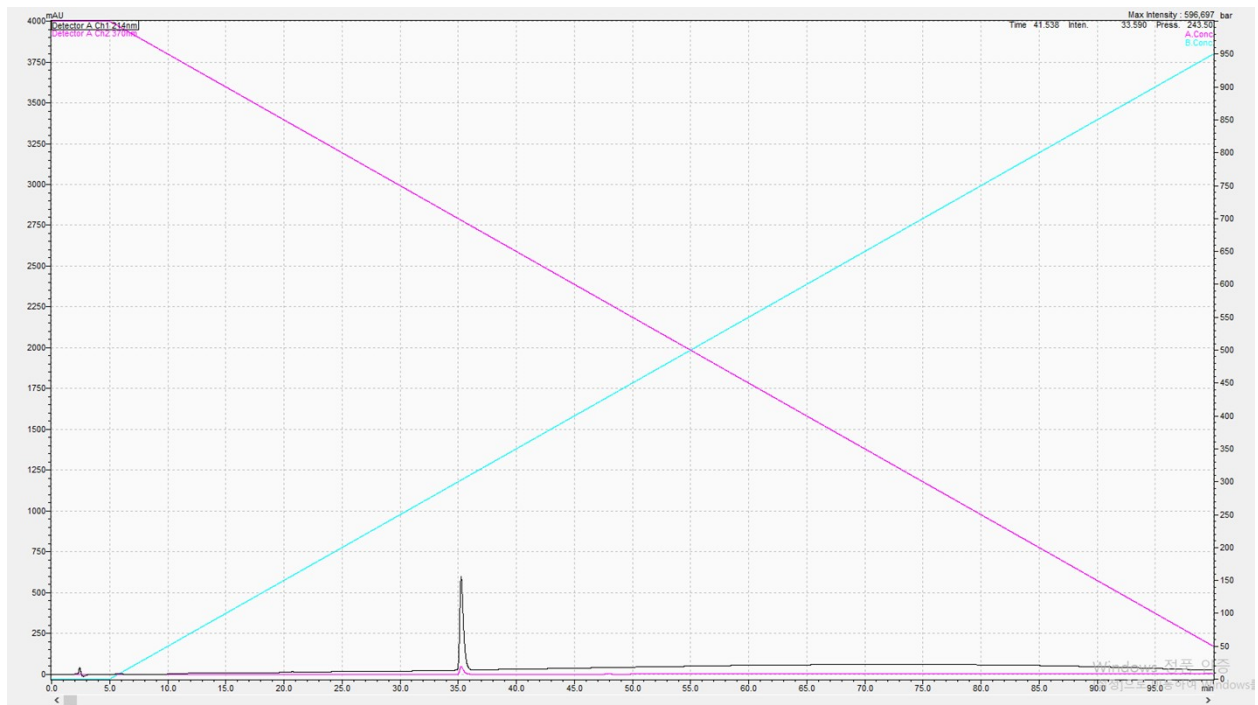

**Figure S13.** HPLC chromatogram of **4**

+MS, 0.2-0.6min #12-32

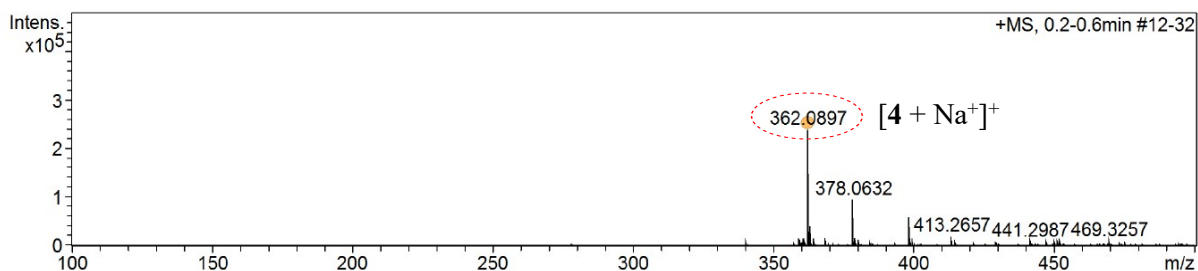

| Meas. m/z | #  | Ion Formula    | m/z      | err [ppm] | mSigma | # Sigma | Score  | rdb  | e <sup>-</sup> Conf | N-Rule |
|-----------|----|----------------|----------|-----------|--------|---------|--------|------|---------------------|--------|
| 362.0897  | 1  | C11H12N11O2S   | 362.0891 | 1.7       | 3.2    | 1       | 100.00 | 11.5 | even                | ok     |
|           | 2  | C14H20NO8S     | 362.0904 | 2.0       | 6.3    | 2       | 89.32  | 5.5  | even                | ok     |
|           | 3  | C15H16N5O4S    | 362.0918 | -5.7      | 9.8    | 3       | 35.32  | 10.5 | even                | ok     |
|           | 4  | C10H16N7O6S    | 362.0877 | -5.4      | 14.3   | 4       | 35.43  | 6.5  | even                | ok     |
|           | 5  | C16H12N9S      | 362.0931 | -9.4      | 20.9   | 5       | 8.31   | 15.5 | even                | ok     |
|           | 6  | C18H20NO3S2    | 362.0879 | 4.9       | 31.6   | 6       | 34.43  | 9.5  | even                | ok     |
|           | 7  | C11H20N7OS3    | 362.0886 | -3.0      | 39.1   | 7       | 44.29  | 5.5  | even                | ok     |
|           | 8  | C10H24N3O5S3   | 362.0873 | 6.7       | 42.7   | 8       | 15.43  | 0.5  | even                | ok     |
|           | 9  | C15H24NO3S3    | 362.0913 | -4.4      | 43.9   | 9       | 27.97  | 4.5  | even                | ok     |
|           | 10 | C11H28N3S5     | 362.0881 | 4.3       | 79.3   | 10      | 8.56   | -0.5 | even                | ok     |
|           | 1  | C13H17N5NaO4S  | 362.0893 | -0.9      | 3.0    | 1       | 100.00 | 7.5  | even                | ok     |
|           | 2  | C14H13N9NaS    | 362.0907 | 2.8       | 10.2   | 2       | 62.65  | 12.5 | even                | ok     |
|           | 3  | C12H21NNaO8S   | 362.0880 | -4.6      | 14.1   | 3       | 37.94  | 2.5  | even                | ok     |
|           | 4  | C18H17N3NaO2S  | 362.0934 | -10.2     | 21.6   | 4       | 5.26   | 11.5 | even                | ok     |
|           | 5  | C10H21N5NaO4S2 | 362.0927 | 8.4       | 23.3   | 5       | 12.53  | 2.5  | even                | ok     |
|           | 6  | C13H25NNaO3S3  | 362.0889 | -2.2      | 41.1   | 6       | 42.86  | 1.5  | even                | ok     |

Figure S14. HRMS (ESI-TOF) spectrum of 4

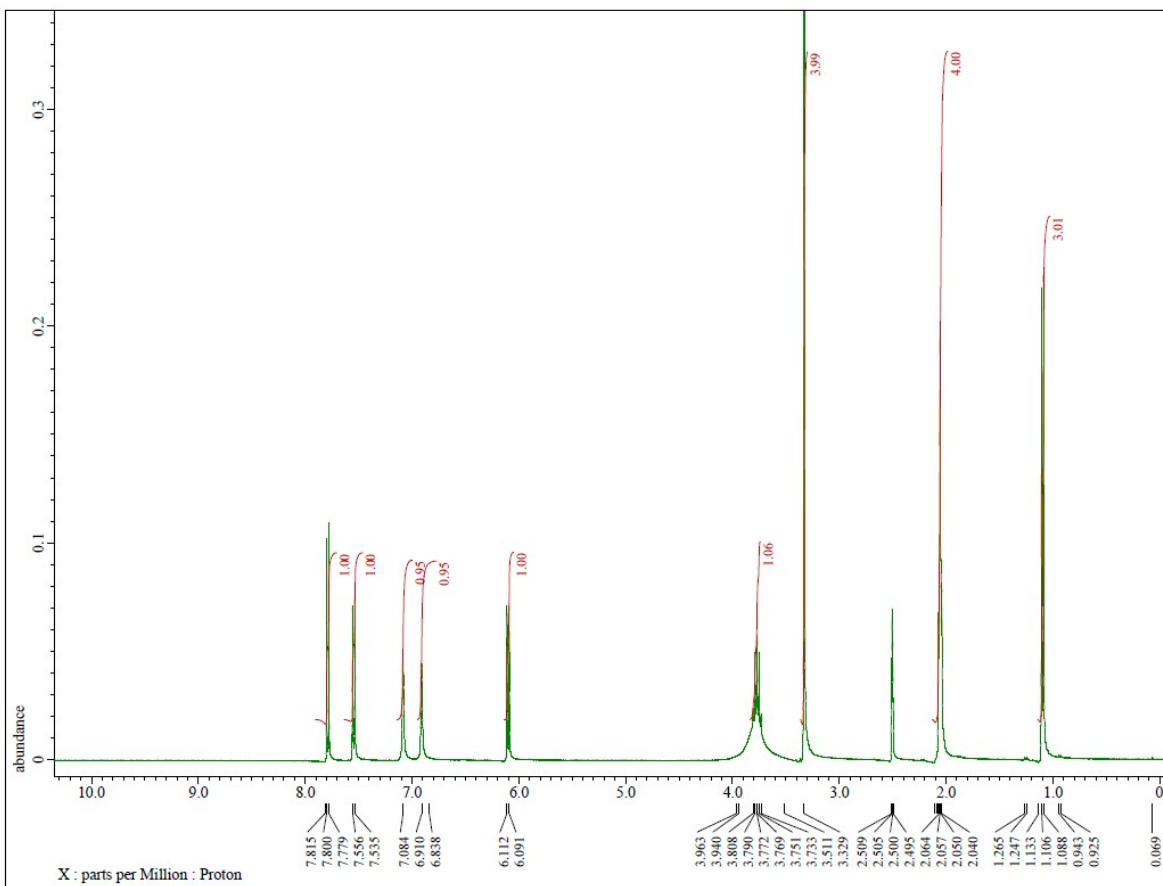

**Figure S15.** <sup>1</sup>H-NMR spectrum of **4** in DMSO-D6



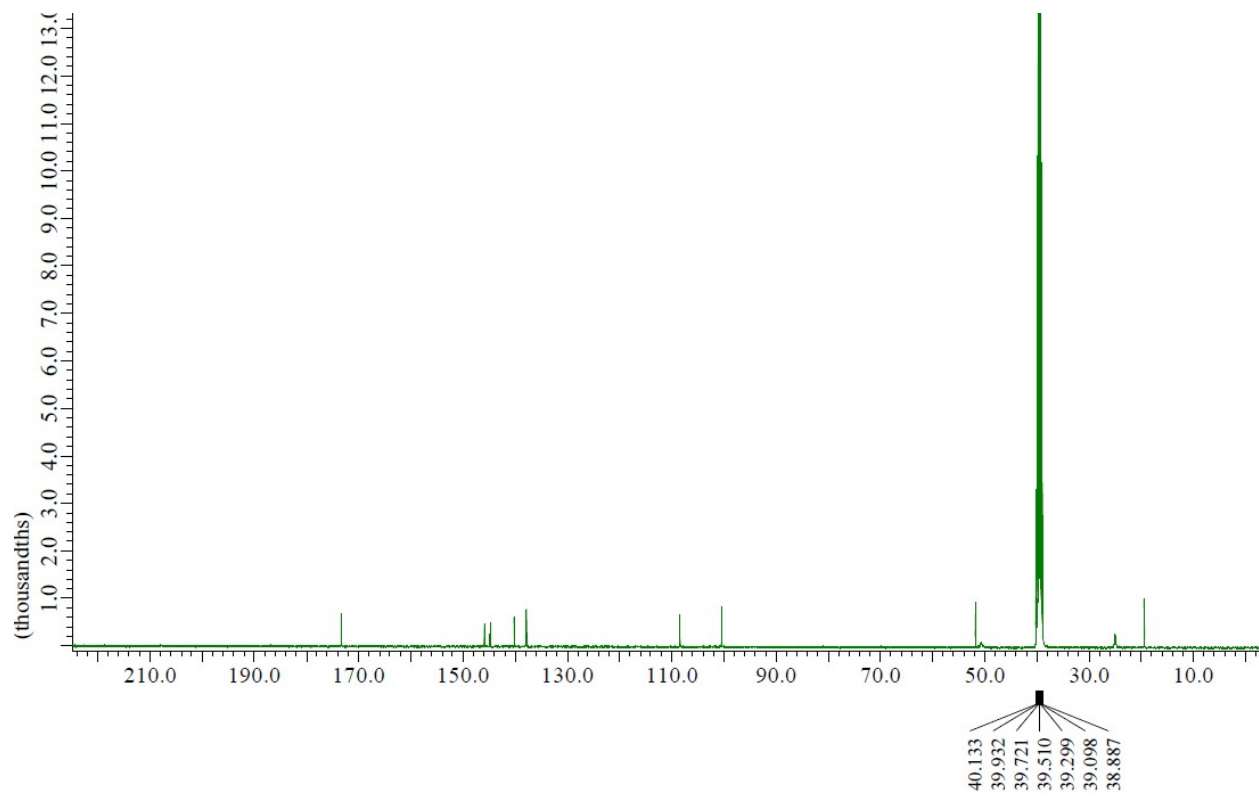

**Figure S16.**  $^{13}\text{C}$ -NMR spectrum of **4** in DMSO- $\text{D}_6$

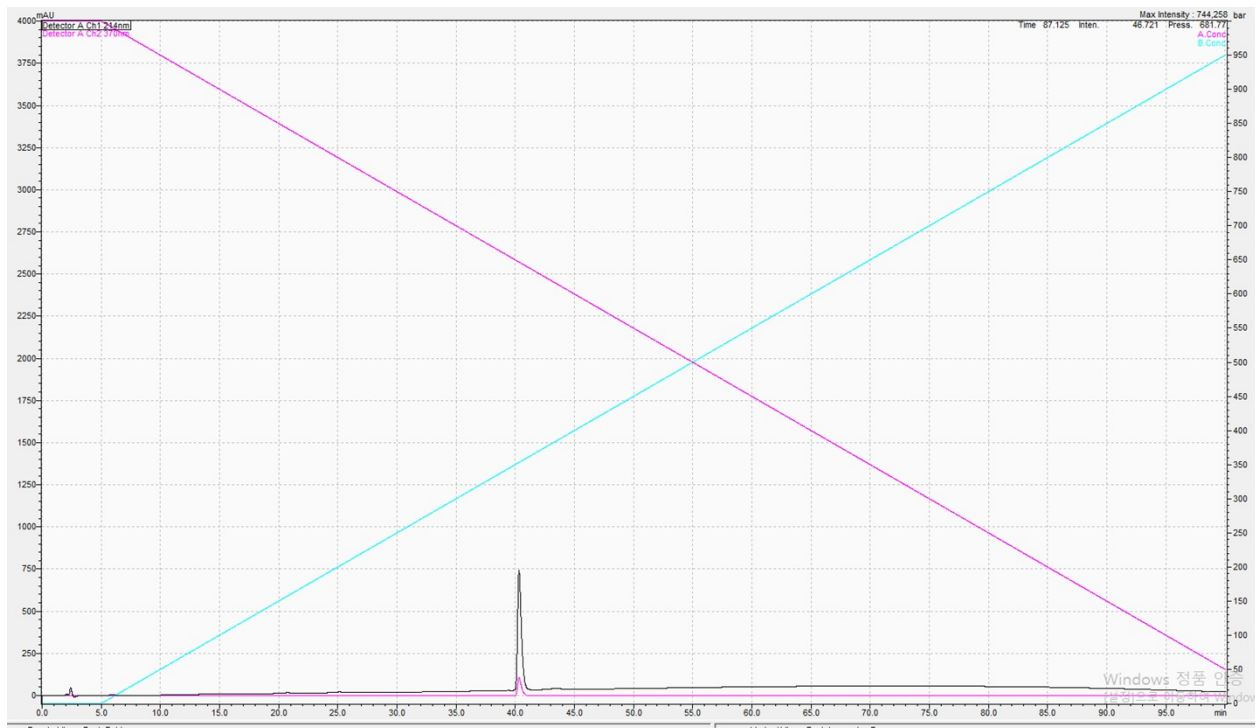

**Figure S17.** HPLC chromatogram of **5**

+MS, 0.2-0.4min #9-25

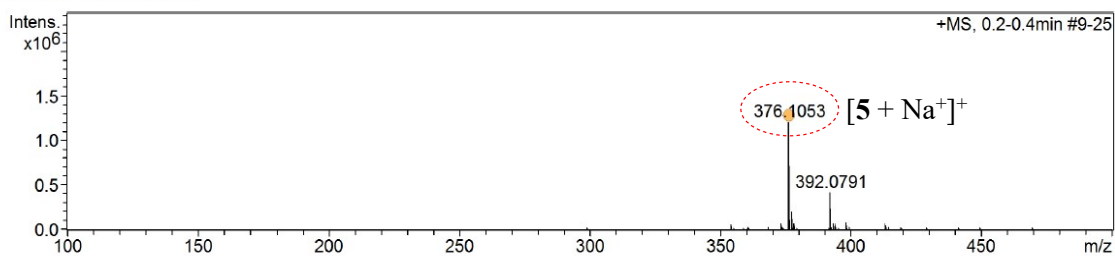

| Meas. m/z | #  | Ion Formula    | m/z      | err [ppm] | mSigma | # Sigma | Score  | rdb  | e <sup>-</sup> Conf | N-Rule |
|-----------|----|----------------|----------|-----------|--------|---------|--------|------|---------------------|--------|
| 376.1053  | 1  | C12H14N11O2S   | 376.1047 | 1.7       | 4.2    | 1       | 100.00 | 11.5 | even                | ok     |
|           | 2  | C15H22NO8S     | 376.1061 | 1.9       | 8.3    | 2       | 88.55  | 5.5  | even                | ok     |
|           | 3  | C11H18N7O6S    | 376.1034 | 5.2       | 8.7    | 3       | 39.95  | 6.5  | even                | ok     |
|           | 4  | C16H18N5O4S    | 376.1074 | 5.5       | 16.2   | 4       | 32.14  | 10.5 | even                | ok     |
|           | 5  | C10H22N3O10S   | 376.1020 | 8.8       | 20.5   | 5       | 9.57   | 1.5  | even                | ok     |
|           | 6  | C17H14N9S      | 376.1087 | -9.0      | 27.2   | 6       | 7.46   | 15.5 | even                | ok     |
|           | 7  | C19H22NO3S2    | 376.1036 | 4.7       | 37.0   | 7       | 30.43  | 9.5  | even                | ok     |
|           | 8  | C12H22N7OS3    | 376.1042 | -2.9      | 41.4   | 8       | 42.24  | 5.5  | even                | ok     |
|           | 9  | C11H26N3O5S3   | 376.1029 | -6.5      | 43.5   | 9       | 15.30  | 0.5  | even                | ok     |
|           | 10 | C16H26NO3S3    | 376.1069 | 4.2       | 47.4   | 10      | 25.95  | 4.5  | even                | ok     |
|           | 11 | C12H30N3S5     | 376.1038 | 4.2       | 74.6   | 11      | 10.47  | -0.5 | even                | ok     |
|           | 1  | C14H19N5NaO4S  | 376.1050 | -0.9      | 5.7    | 1       | 100.00 | 7.5  | even                | ok     |
|           | 2  | C10H15N11NaO2S | 376.1023 | -8.1      | 6.9    | 2       | 14.69  | 8.5  | even                | ok     |
|           | 3  | C13H23NNaO8S   | 376.1037 | 4.5       | 9.3    | 3       | 43.44  | 2.5  | even                | ok     |
|           | 4  | C15H15N9NaS    | 376.1063 | 2.6       | 16.2   | 4       | 59.00  | 12.5 | even                | ok     |
|           | 5  | C11H23N5NaO4S2 | 376.1084 | -8.0      | 22.7   | 5       | 13.52  | 2.5  | even                | ok     |
|           | 6  | C19H19N3NaO2S  | 376.1090 | 9.8       | 28.1   | 6       | 4.84   | 11.5 | even                | ok     |
|           | 7  | C10H23N7NaOS3  | 376.1018 | 9.3       | 39.8   | 7       | 5.44   | 2.5  | even                | ok     |
|           | 8  | C14H27NNaO3S3  | 376.1045 | -2.2      | 43.4   | 8       | 41.97  | 1.5  | even                | ok     |

Figure S18. HRMS (ESI-TOF) spectrum of 5

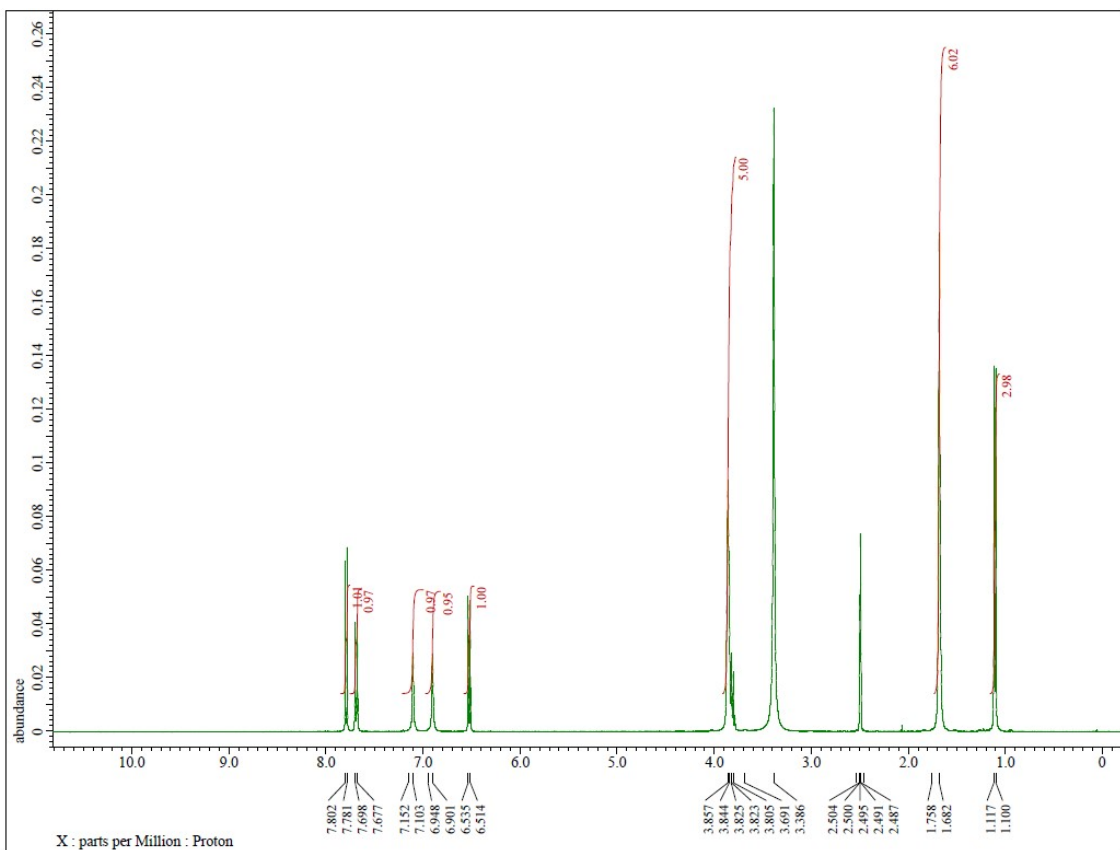

**Figure S19.**  $^1\text{H-NMR}$  spectrum of **5** in  $\text{DMSO-D}_6$

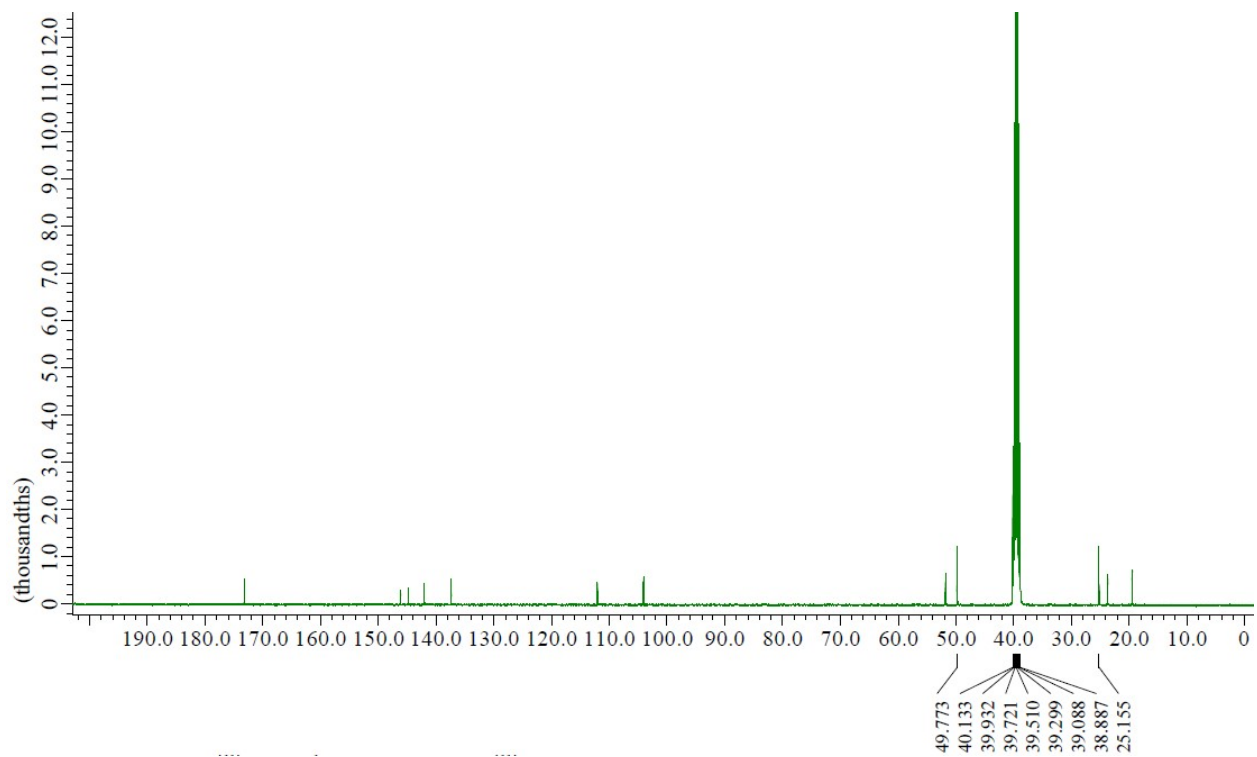

**Figure S20.**  $^{13}\text{C}$ -NMR spectrum of **5** in DMSO- $\text{D}_6$

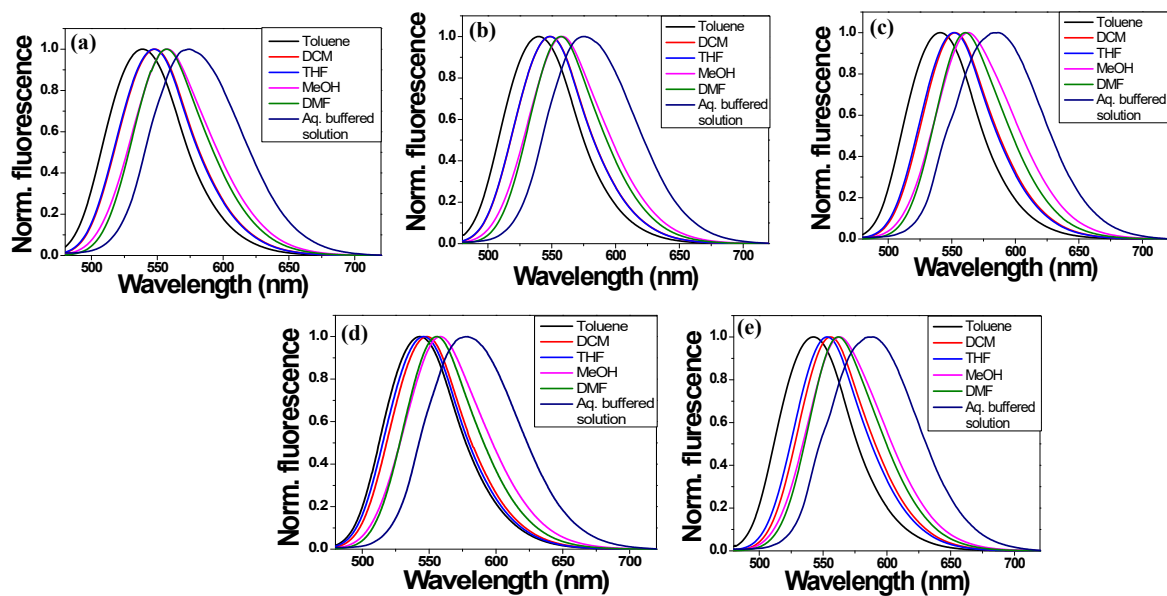

**Figure S21.** Normalized fluorescence emission spectra of 1-5 [20  $\mu\text{M}$ ] in various solvents. (a; 1, b; 2, c; 3, d; 4, and e; 5).

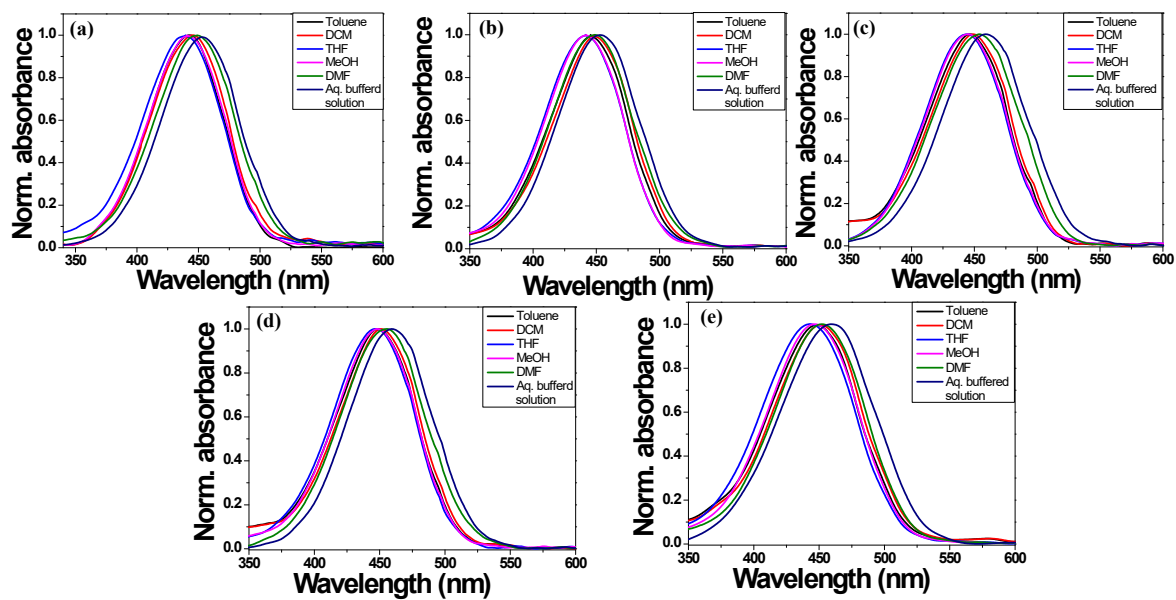

**Figure S22.** Normalized UV-visible emission spectra of probes 1-5 [20  $\mu$ M] in different solvent system. (a; 1, b; 2, c; 3, d; 4, and e; 5).

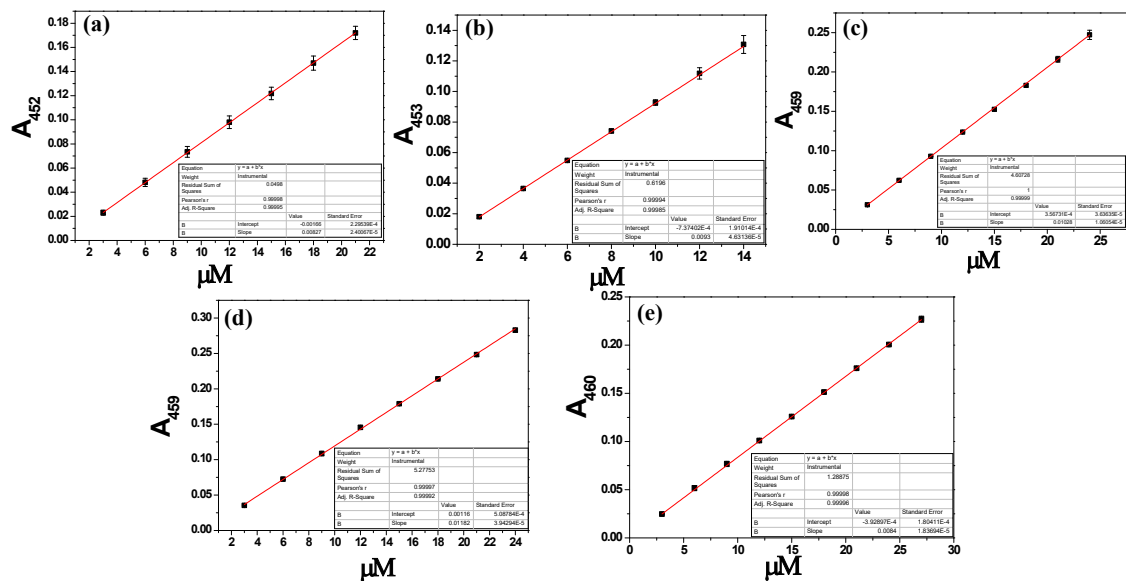

**Figure S23.** Linear plot of absorption band as a function of concentration of 1-5 in aqueous buffered solution (10 mM HEPES at pH 7.4) containing 0.5% DMF (a; 1, b; 2, c; 3, d; 4, and e; 5).



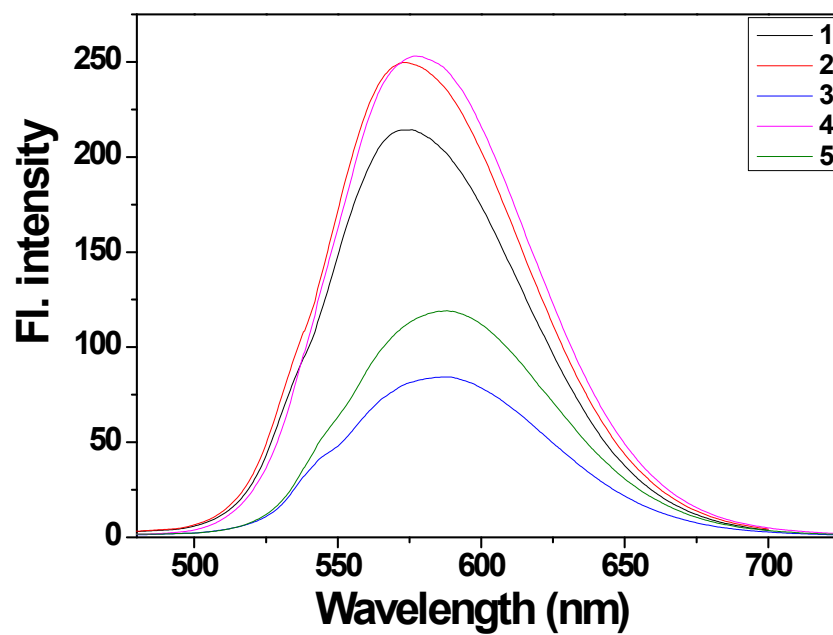

**Figure S24.** Fluorescence emission spectra of **1-5** [20  $\mu$ M] in aqueous buffered solution (10 mM HEPES, pH 7.4) containing 0.5% DMF (Sensitivity high, slit=10/10).

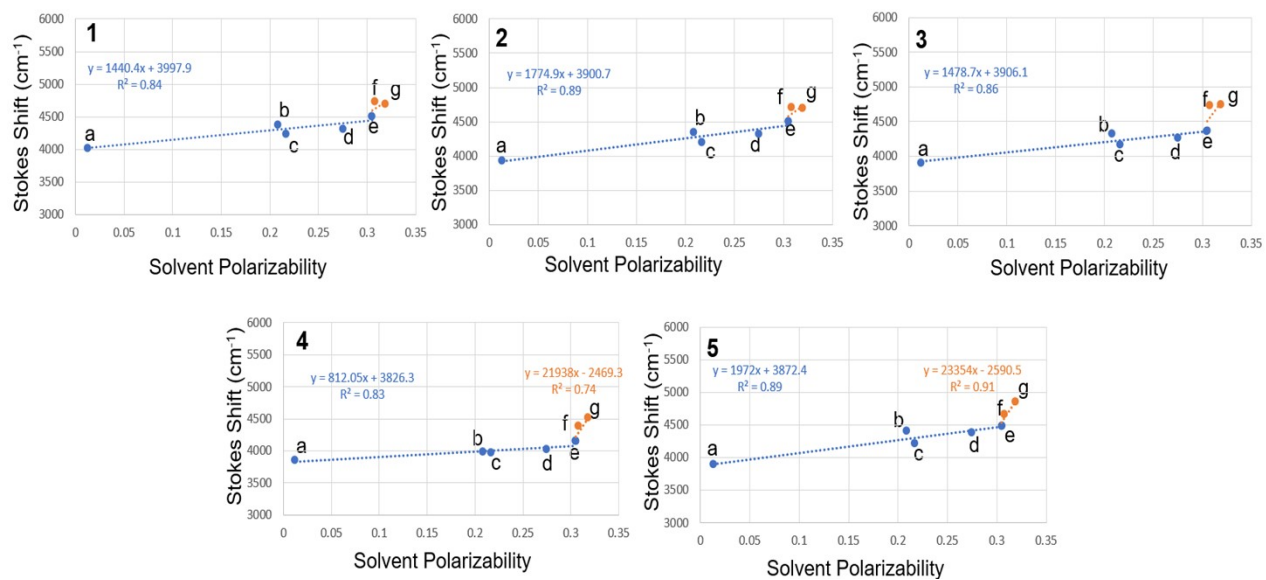

**Figure S25.** Lippert-Mataga plot of **1-5** in different solvents (a; toluene, b; THF, c; DCM, d; DMF, e; ACN, f; methanol; and g; aqueous buffered solution [10 mM HEPES, pH 7.4 containing 0.5% DMF]) showing the variation of Stokes shift as a function of orientation polarizability of the solvents

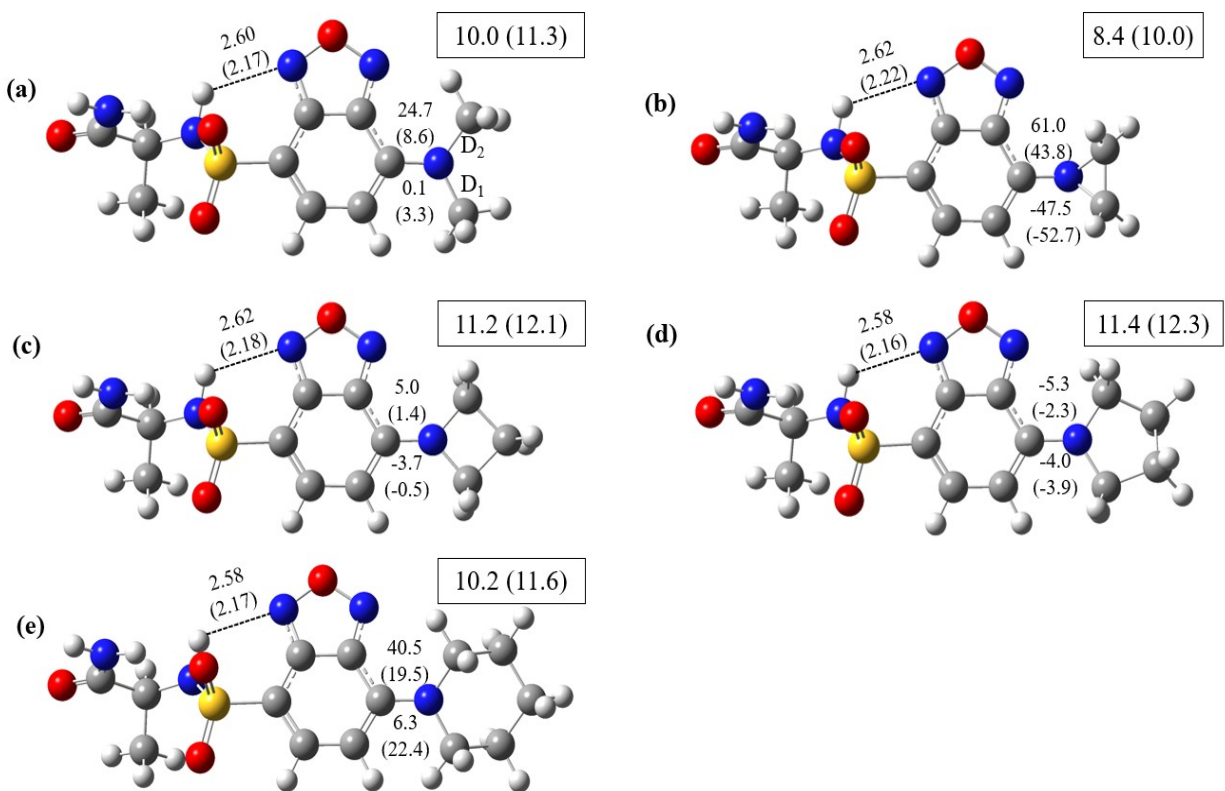

**Figure S26.** Optimized structures of (a) **1**, (b) **2**, (c) **3**, (d) **4**, and (e) **5** in the ground and excited states. Two torsional angles (in °), D<sub>1</sub> and D<sub>2</sub>, are shown in each figure. Dipole moments (in D) are shown in the rectangular box and some important bond lengths (in Å) of the probes are also shown. The values in parentheses are for the excited states. Dipole

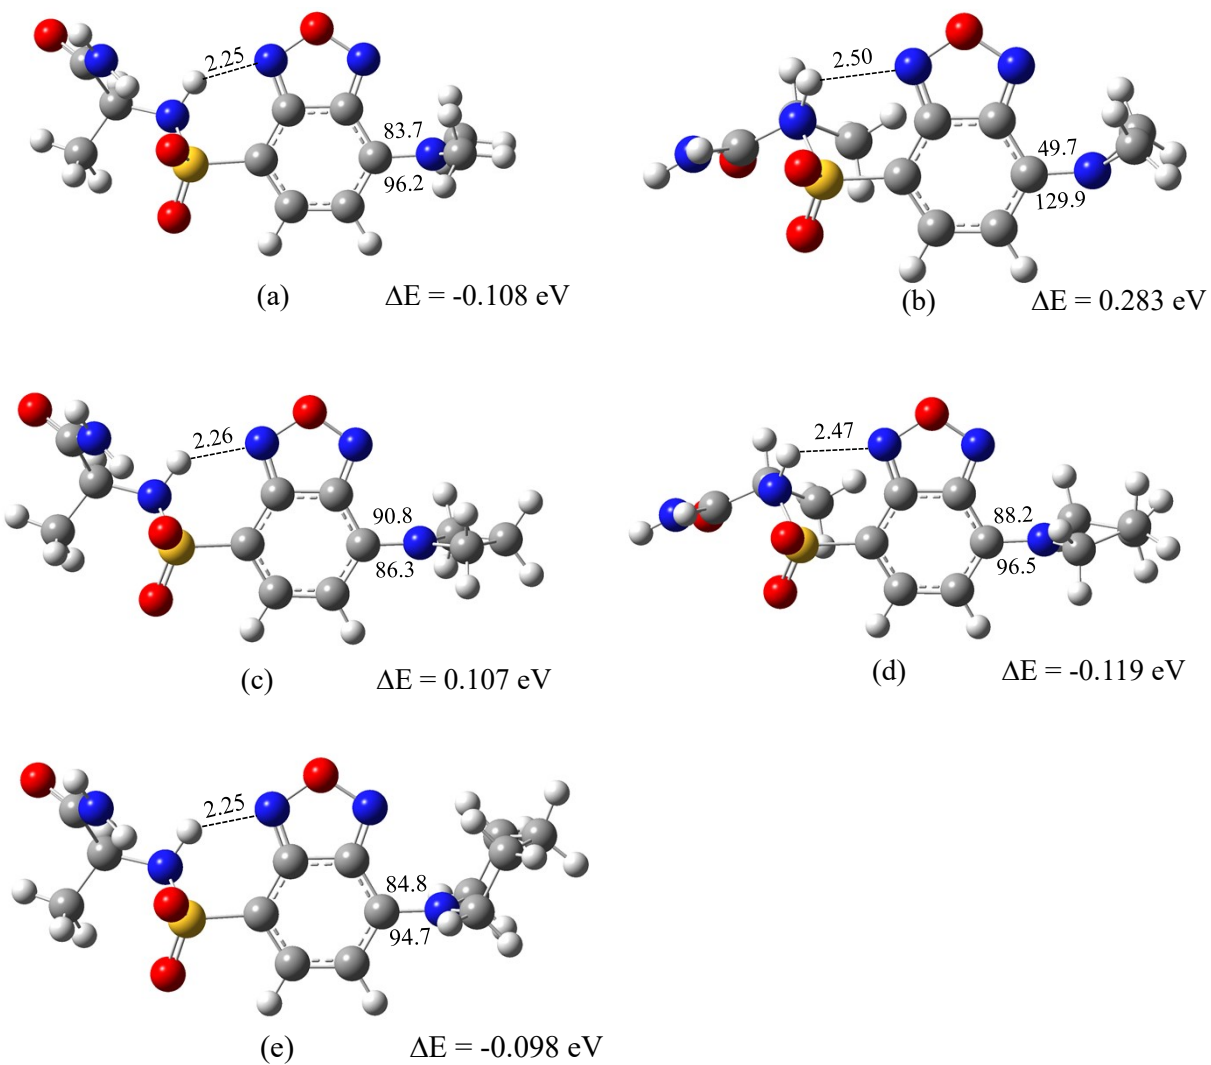

**Figure S27.** Optimized TICT structures for (a) **1**, (b) **2**, (c) **3**, (d) **4**, and (e) **5** in the excited states. Two torsional angles (in  $^{\circ}$ ) and some important bond lengths (in  $\text{\AA}$ ) are shown in each figure.  $\Delta E$  denotes energy difference between LE and TICT states.

**Table**

Stokes

| Solvent                                   | Probe    | $\lambda_{Ex}$ (nm) | $\lambda_{Em}$ (nm) | $\Delta\lambda$ (nm) | $\Delta\nu$ (cm <sup>-1</sup> ) |
|-------------------------------------------|----------|---------------------|---------------------|----------------------|---------------------------------|
| <b>Aqueous buffered solution (pH=7.4)</b> | <b>1</b> | 452                 | 574                 | 122                  | 4702                            |
|                                           | <b>2</b> | 453                 | 575.5               | 122.5                | 4699                            |
|                                           | <b>3</b> | 459                 | 587                 | 128                  | 4751                            |
|                                           | <b>4</b> | 459.5               | 579                 | 119.5                | 4507                            |
|                                           | <b>5</b> | 458.5               | 589.5               | 131                  | 4847                            |
| <b>DMF</b>                                | <b>1</b> | 449                 | 557                 | 108                  | 4318                            |
|                                           | <b>2</b> | 449                 | 557                 | 108                  | 4318                            |
|                                           | <b>3</b> | 454                 | 560.5               | 106.5                | 4185                            |
|                                           | <b>4</b> | 455.5               | 556                 | 100.5                | 3968                            |
|                                           | <b>5</b> | 451.5               | 562                 | 110.5                | 4379                            |
| <b>MeOH</b>                               | <b>1</b> | 441                 | 557.5               | 116.5                | 4739                            |
|                                           | <b>2</b> | 442                 | 558.5               | 116.5                | 4719                            |
|                                           | <b>3</b> | 444.5               | 563                 | 118.5                | 4735                            |
|                                           | <b>4</b> | 448.5               | 558.5               | 110                  | 4391                            |
|                                           | <b>5</b> | 446                 | 563                 | 117                  | 4660                            |
| <b>ACN</b>                                | <b>1</b> | 444.5               | 557                 | 112.5                | 4544                            |
|                                           | <b>2</b> | 444.5               | 557.5               | 113                  | 4509                            |
|                                           | <b>3</b> | 450.5               | 561                 | 110.5                | 4372                            |
|                                           | <b>4</b> | 452                 | 557                 | 105                  | 4170                            |
|                                           | <b>5</b> | 449.5               | 563                 | 113.5                | 4485                            |
| <b>THF</b>                                | <b>1</b> | 439.5               | 547.5               | 108                  | 4488                            |
|                                           | <b>2</b> | 441.5               | 548.5               | 107                  | 4419                            |
|                                           | <b>3</b> | 444                 | 551.5               | 107.5                | 4390                            |
|                                           | <b>4</b> | 447.5               | 546                 | 98.5                 | 4031                            |
|                                           | <b>5</b> | 443                 | 553                 | 110                  | 4490                            |
| <b>DCM</b>                                | <b>1</b> | 445                 | 548                 | 103                  | 4224                            |
|                                           | <b>2</b> | 448.5               | 549                 | 100.5                | 4082                            |
|                                           | <b>3</b> | 449                 | 552.5               | 103.5                | 4172                            |
|                                           | <b>4</b> | 451.5               | 548.5               | 97                   | 3917                            |

**S1:** Absorption maxima, emission maxima and shift of **1-5** in various solvents.

|                |          |       |       |       |      |
|----------------|----------|-------|-------|-------|------|
|                | <b>5</b> | 451   | 555.5 | 104.5 | 4171 |
| <b>Toluene</b> | <b>1</b> | 443   | 539   | 96    | 4020 |
|                | <b>2</b> | 445.5 | 540   | 94.5  | 3928 |
|                | <b>3</b> | 446.5 | 541   | 94.5  | 3912 |
|                | <b>4</b> | 449   | 543   | 94    | 3856 |
|                | <b>5</b> | 448   | 542.5 | 94.5  | 3888 |

Table S2. Quantum yields in methanol, DMF, and DCM.

| Probe    | $\phi$ (Methanol) | $\phi$ (DMF) | $\phi$ (DCM) |
|----------|-------------------|--------------|--------------|
| <b>1</b> | 0.049             | 0.246        | 0.688        |
| <b>2</b> | 0.032             | 0.282        | 0.775        |
| <b>3</b> | 0.021             | 0.161        | 0.309        |
| <b>4</b> | 0.044             | 0.375        | 0.697        |
| <b>5</b> | 0.036             | 0.231        | 0.667        |
